# Supplementary material
Source: publisher site journal article supplement (https://www.spandidos-publications.com/8294/downloadSupplementary)
Supplement: Supplementary file 1 [file downloadSupplementary]

## Data S1

*Genotype confirmation of wild-type (WT) and CD8 knockout (CD8<sup>-/-</sup>) mice.* Mouse tail tips (length, 1-2 mm) were excised and harvested for genomic (g)DNA extraction, which was performed using the TIANamp Genomic DNA kit (TIANGEN; cat. no. DP304) in strict accordance with the manufacturer's protocol. The concentration of the obtained template gDNA was adjusted to 20-80 ng/ $\mu$ l. With the extracted gDNA as the template, PCR amplification was performed using the 2X Rapid Taq Master Mix Kit (Vazyme; cat. no. P222). The primer sequences of CD8a for PCR1 were as follows: Forward, 5'-GGGAACCCAAGAACCTATCTACAAG-3' and reverse, 5'-GGAGTGAATGGTTTGTGAGGT

GG-3'. The primer sequences of CD8a for PCR2 were as follows: Forward, 5'-CTGGGTGGGATTGGAAGTGAT-3' and reverse, 5'-CAAGAAGGAGCCGTTTCCTAGC-3'. The thermocycling conditions were as follows: Pre-denaturation at 95°C for 5 min; first-stage amplification (20 cycles) with denaturation at 98°C for 30 sec, annealing at 65°C for 30 sec and extension at 72°C for 45 sec; second-stage amplification (15 cycles) of denaturation at 98°C for 30 sec, annealing at 55°C for 30 sec and extension at 72°C for 45 sec; final extension at 72°C for 5 min; and a final hold at 10°C. PCR amplification products were subjected to 1.5% agarose gel electrophoresis, stained with Stains GeneRed solution (TIANGEN; cat. no. RT211), and visualized under ultraviolet light.
